# Supplementary material
Source: Royal Society of Chemistry journal article supplement (doi:10.1039/d6sm00219f)
Supplement: d6sm00219f1.pdf [file d6sm00219f1.pdf]

Electronic Supplementary Information (ESI)

# Mechanically Robust PEDOT:PSS Hydrogel via Mild Liquid Metal Crosslinking \*

*Qian Zhou<sup>1</sup>, Azur Azapagic<sup>1</sup>, Austin Eiting<sup>1</sup>, Seoyeon Won<sup>1</sup>, Alexandra Boyadzhiev<sup>1</sup>, Himanshu Sant<sup>1</sup>, Deisy Cristina Carvalho Fernandes<sup>1</sup>, Huanan Zhang<sup>1\*</sup>*

<sup>1</sup>Department of Chemical Engineering, University of Utah, Salt Lake City, Utah 84112, United States

**Corresponding Author**

\*Huanan Zhang, zhang@chemeng.utah.edu

## S1. Control experiment: EGaIn-PP hydrogel prepared without DBSA

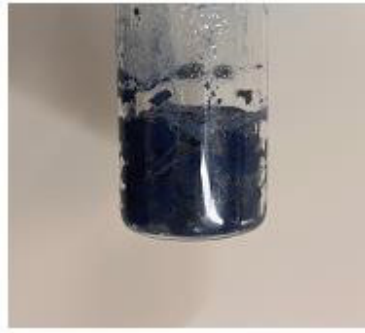

**Figure S1.** Photograph of the EGaIn-PP hydrogel prepared without DBSA.

## S2. Effect of ultrasonication conditions on the size of EGaIn nanoparticles

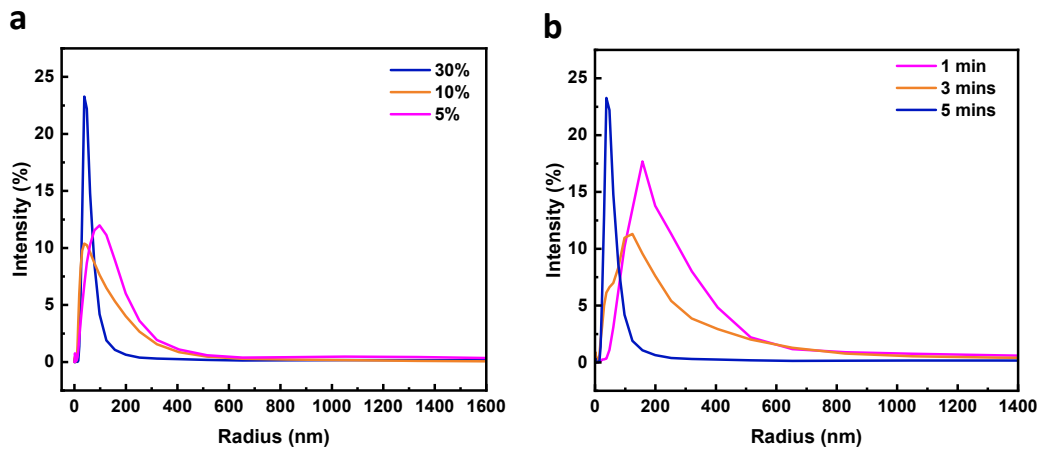

**Figure S2.** Effect of (a) ultrasonication amplitude and (b) ultrasonication time on the size of EGaIn nanoparticles.

### S3. KWW growth model fitting of time-dependent modulus evolution

The time-dependent evolution of the storage modulus of the PEDOT:PSS and EGaIn-PP hydrogels was analyzed using a stretched-exponential Kohlrausch–Williams–Watts (KWW) growth model. The experimental data (average) were fitted using the following expression:

$$G'(t) = G'\infty - (G'\infty - G'0) \exp\left[-\left(\frac{t}{\lambda}\right)^\beta\right]$$

where  $G'(t)$  is the storage modulus at time  $t$ ,  $G'0$  is the initial storage modulus at the beginning of the measurement, and  $G'\infty$  is the asymptotic storage modulus at long times.

The parameter  $\lambda$  is the characteristic time constant describing the timescale of network development, and the stretching exponent  $\beta$  ( $0 < \beta \leq 1$ ) reflects the breadth of the relaxation or growth time distribution. A value of  $\beta = 1$  corresponds to a single exponential growth process with a narrow and homogeneous relaxation spectrum, whereas  $\beta < 1$  indicates a broader distribution of characteristic times and a higher degree of dynamic and structural heterogeneity within the evolving network.

In the context of hydrogel formation, the KWW growth model provides a phenomenological description of the progressive network reinforcement process arising from the formation and rearrangement of physical crosslinks. A smaller  $\lambda$  represents faster modulus evolution, while a lower  $\beta$  indicates a more heterogeneous and dynamically evolving network structure.

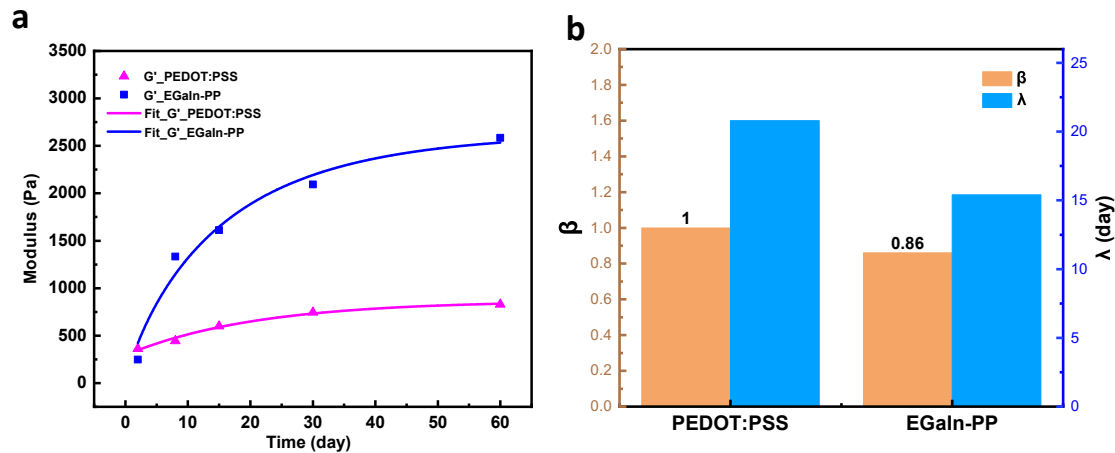

**Figure S3.** (a) KWW growth model fitting of the time-dependent storage modulus evolution of the PEDOT:PSS hydrogel and the EGaIn-PP hydrogel. (b) Comparison of the fitted KWW parameters, including the stretching exponent  $\beta$  and characteristic time  $\lambda$ , for the PEDOT:PSS hydrogel and the EGaIn-PP hydrogel.

#### S4. Cyclic compression stress–strain curves of the PEDOT:PSS hydrogel

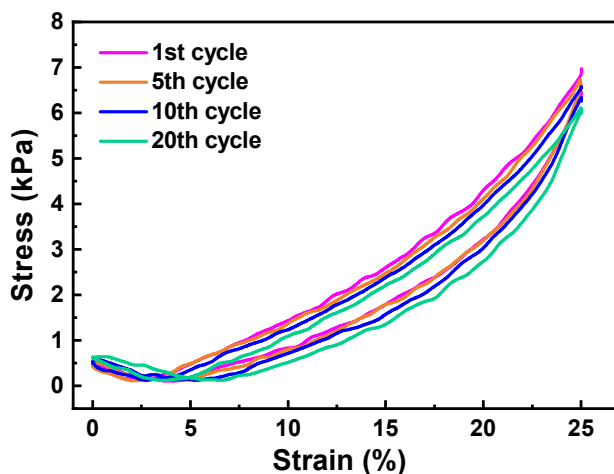

**Figure S4.** Cyclic compression stress–strain curves of the PEDOT:PSS hydrogel

#### S5. Electrical Characterization of Hydrogels

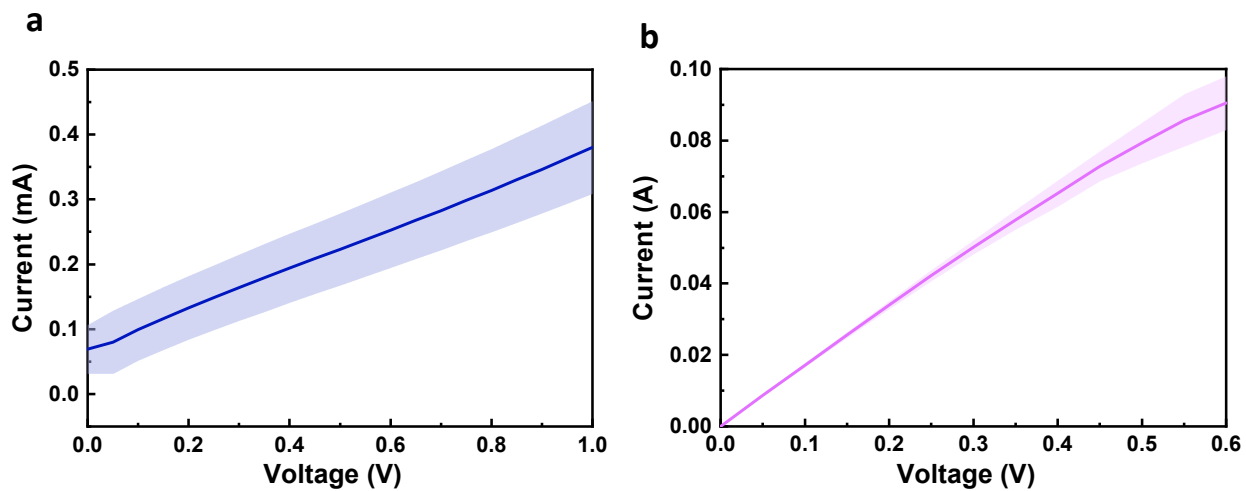

**Figure S5.** Current–voltage (I–V) characteristics of (a) the EGaIn–PP hydrogel and (b) PEDOT:PSS hydrogel measured using a two-electrode (parallel-plate) configuration.
